# Supplementary material for: Generation of Flag/DYKDDDDK Epitope Tag Knock-In Mice Using i-GONAD Enables Detection of Endogenous CaMKIIα and β Proteins
Source: MDPI journal article supplement (doi:10.3390/ijms231911915), 2022-10-07
Supplement: s1 [file s1]

## Supplementary Figure

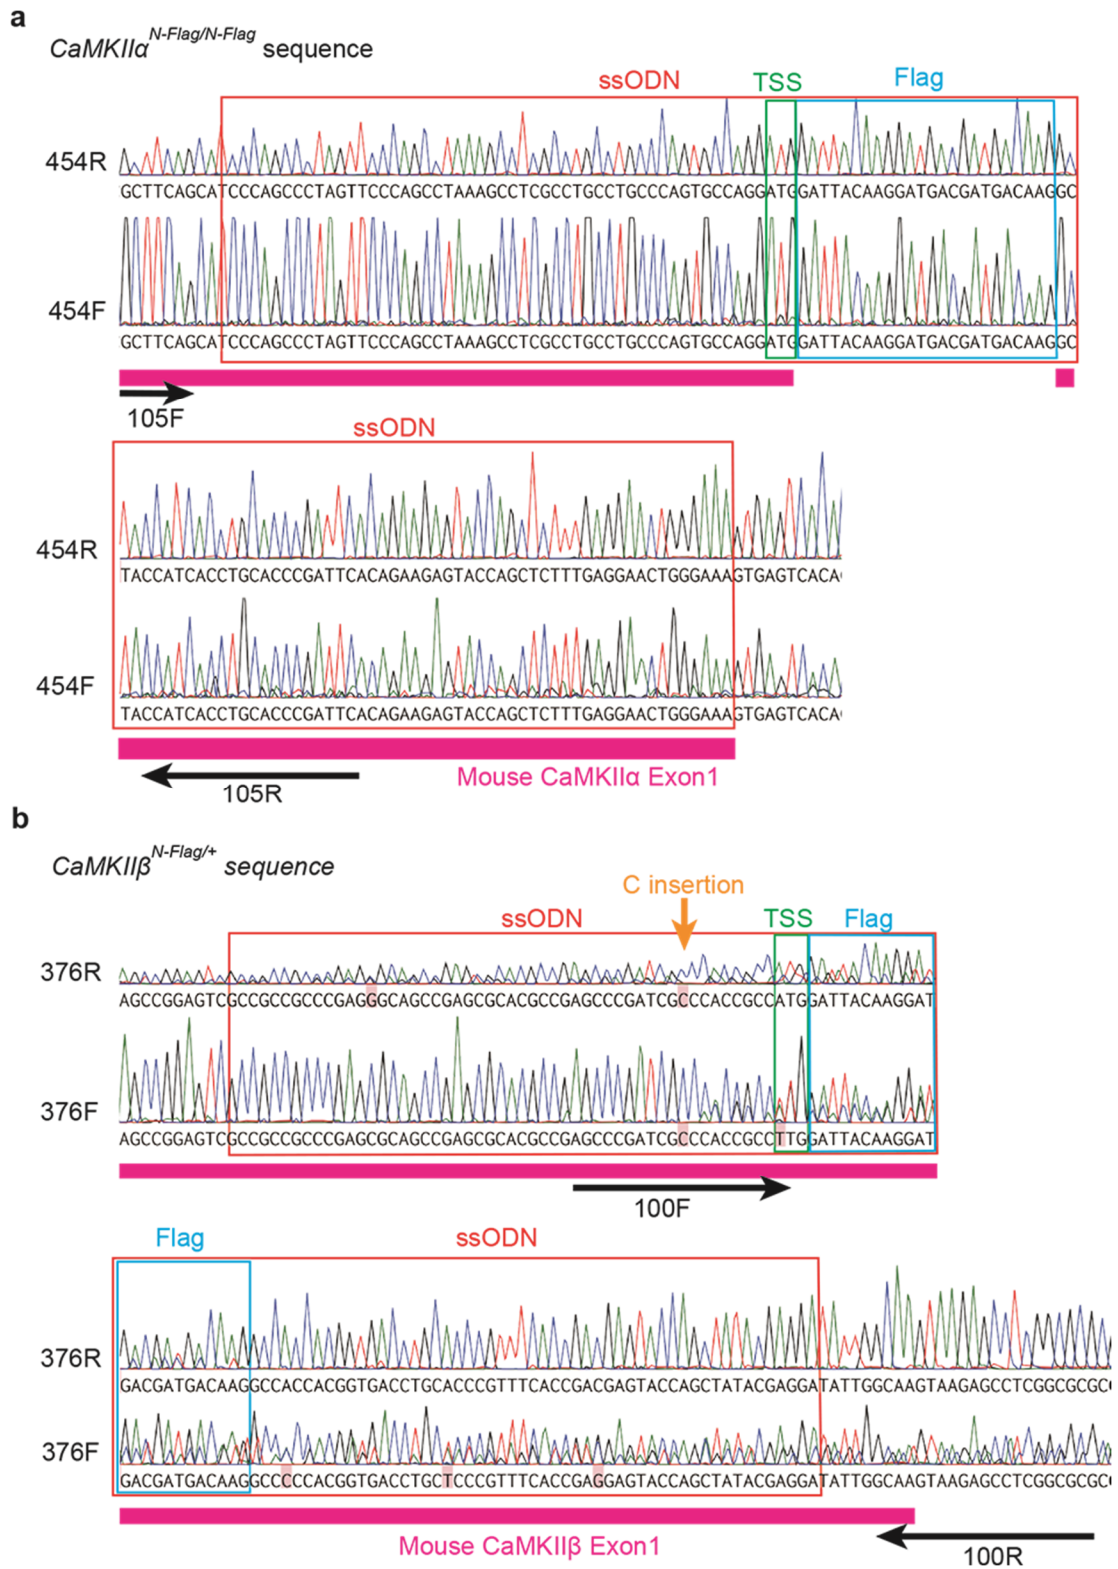

**Figure S1.** The Sanger sequence including ssODN of knock-in region of *CaMKII $\alpha$* <sup>N-Flag/N-Flag</sup>

*homozygous (a)* and *CaMKII $\beta$ <sup>N-Flag/+</sup>* heterozygous (**b**) mouse using 454F/454R primers for *CaMKII $\alpha$*  and 376F/R primers for *CaMKII $\beta$* . Red square shows ssODN. Green square shows transcriptional starting site (TSS, ATG codon). Blue square shows Flag sequence. Pink bar shows exon1 region of mouse *CaMKII $\alpha$*  and *CaMKII $\beta$*  gene. Yellow arrow shows C insertion.
